# Supplementary material for: Enhancing the Capacity and Stability by CoFe2O4 Modified g-C3N4 Composite for Lithium-Oxygen Batteries
Source: MDPI journal article supplement (doi:10.3390/nano11051088), 2021-04-22
Supplement: s1 [file s1]

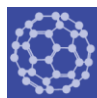

## Supporting Information

# Enhancing the Capacity and Stability by $\text{CoFe}_2\text{O}_4$ Modified g- $\text{C}_3\text{N}_4$ Composite for Lithium-Oxygen Batteries

Xiaoya Li <sup>1</sup>, Yajun Zhao <sup>1</sup>, Lei Ding <sup>1</sup>, Deqiang Wang <sup>1</sup>, Qi Guo <sup>1</sup>, Zhiwei Li <sup>1</sup>, Hao Luo <sup>1,\*</sup>, Dawei Zhang <sup>1</sup> and Yan Yu <sup>2,\*</sup>

<sup>1</sup> School of Chemistry and Chemical Engineering, Hefei University of Technology, Hefei 230009, China; Sabrina\_lxy@163.com (X.L.); zyj251264@163.com (Y.Z.); dlei1107@163.com (L.D.); wondreful26@163.com (D.W.); 18297919084@163.com (Q.G.); Zhiwei.Li@hfut.edu.cn (Z.L.); zhangdw@ustc.edu.cn (D.Z.)

<sup>2</sup> Department of Materials of Science and Engineering, University of Science and Technology, Hefei 230026, China

\* Correspondence: luohao@hfut.edu.cn (H.L.); yanyumse@ustc.edu.cn (Y.Y.)

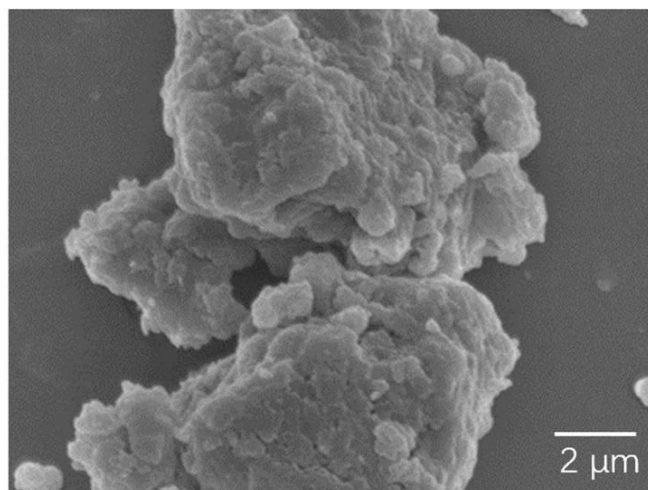

**Figure S1.** SEM image of bulk g-C<sub>3</sub>N<sub>4</sub>.

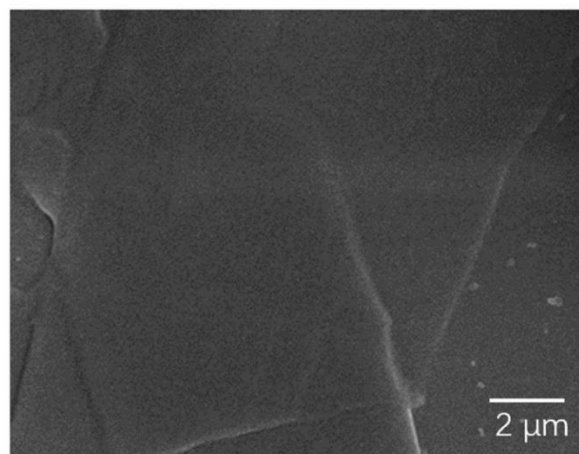

**Figure S2.** SEM image of flake g-C<sub>3</sub>N<sub>4</sub>.

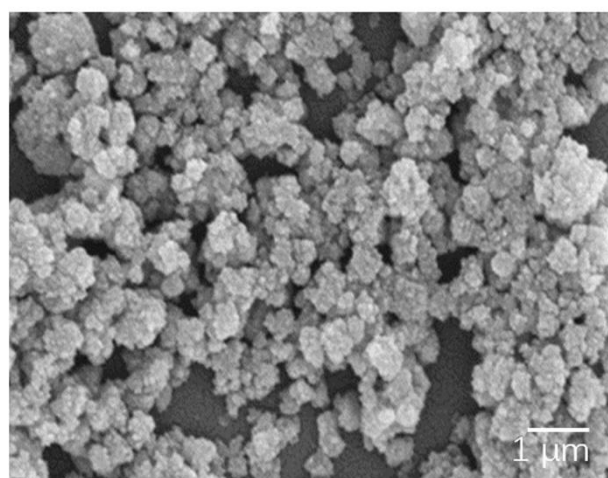

**Figure S3.** SEM image of CoFe<sub>2</sub>O<sub>4</sub> cathode.

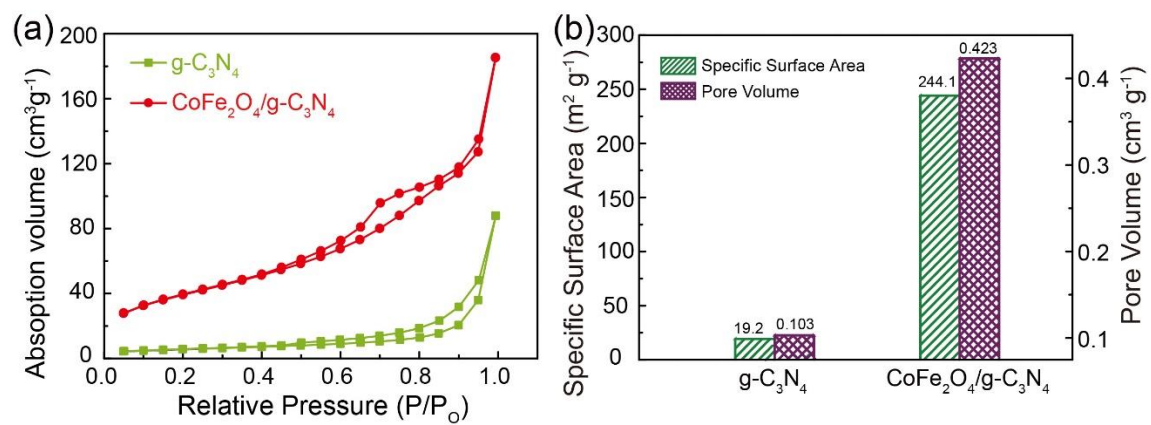

**Figure S4.** (a)  $N_2$  adsorption-desorption isotherms and (b) specific surface area and pore volume of  $g-C_3N_4$  and  $CoFe_2O_4/g-C_3N_4$ .
